# Supplementary material for: Identification of Compound CB-2 as a Novel Late-Stage Autophagy Inhibitor Exhibits Inhibitory Potency against A549 Cells
Source: MDPI journal article supplement (doi:10.3390/life11080865), 2021-08-23
Supplement: s1 [file s1]

## Supplementary Materials

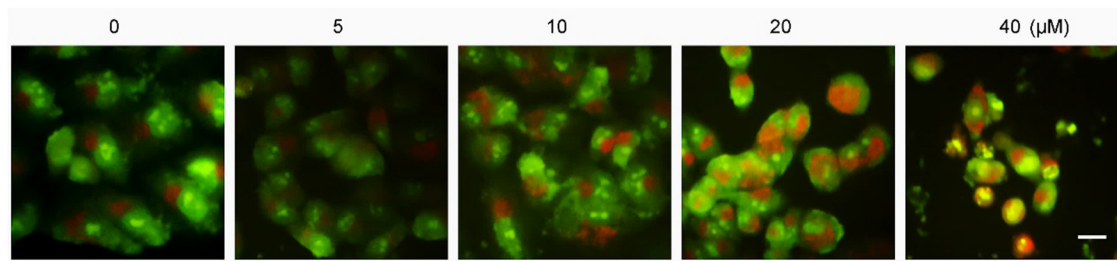

**Figure S1.** CB-2 induces the accumulation of acidic vesicular organelles in the cytoplasm of A549 cells. Fluorescence photographs of acridine orange (AO) staining of A549 cells treated with various doses (0-40  $\mu$ M) of CB-2 for 24 h. Scale bar represent 10  $\mu$ m.

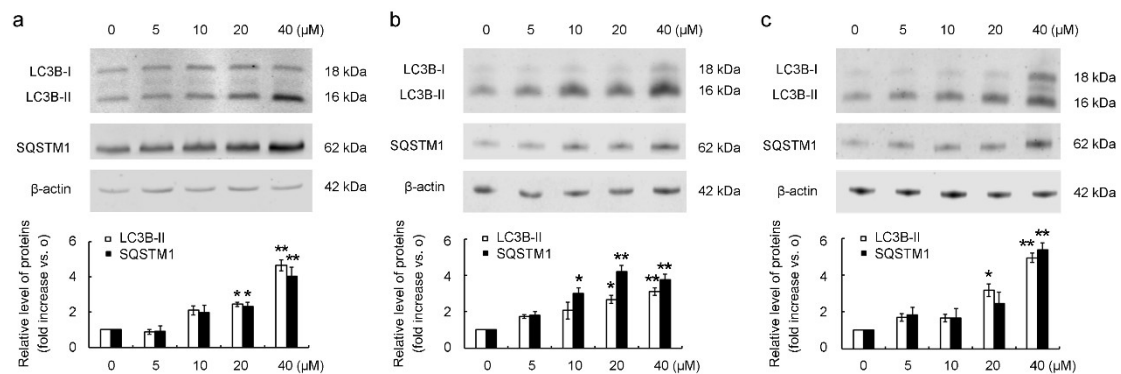

**Figure S2.** CB-2 induces the accumulation of LC3B-II and SQSTM1 in another NSCLC cell line H157 **a**, the human hepatocellular liver carcinoma cell line HepG2 **b**, and human breast carcinoma cell line MCF-7 **c**. Western blot analysis of LC3B-II and SQSTM1 levels in A549 cells treated with various doses (0-40  $\mu$ M) of CB-2 for 24 h.  $\beta$ -actin was used as a loading control. (n = 3; \*  $p$  < 0.05, \*\*  $p$  < 0.01 vs. 0).

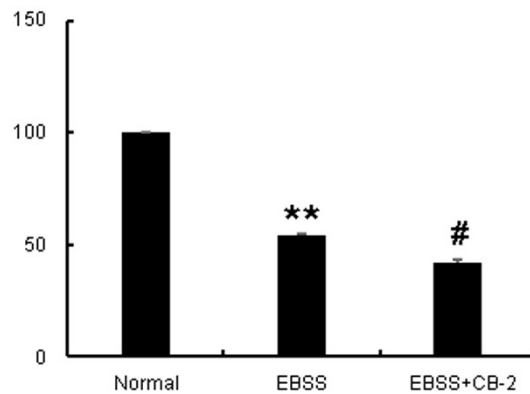

**Figure S3.** CB-2 treatment leads to a decrease of cell viability of A549 cells upon starvation stress. MTT assay for detecting cell viability of A549 cells treated with CB-2 in starvation condition for 24 h. (n = 3; \*\*  $p$  < 0.01 vs. Normal, #  $p$  < 0.05 vs. EBSS).
